# Supplementary material for: Urolithin A Is a Dietary Microbiota-Derived Human Aryl Hydrocarbon Receptor Antagonist
Source: Preprints.org preprint supplement (doi:10.20944/preprints201810.0746.v1), 2018-10-31
Supplement: Supplementary file 1 [file supplementary]

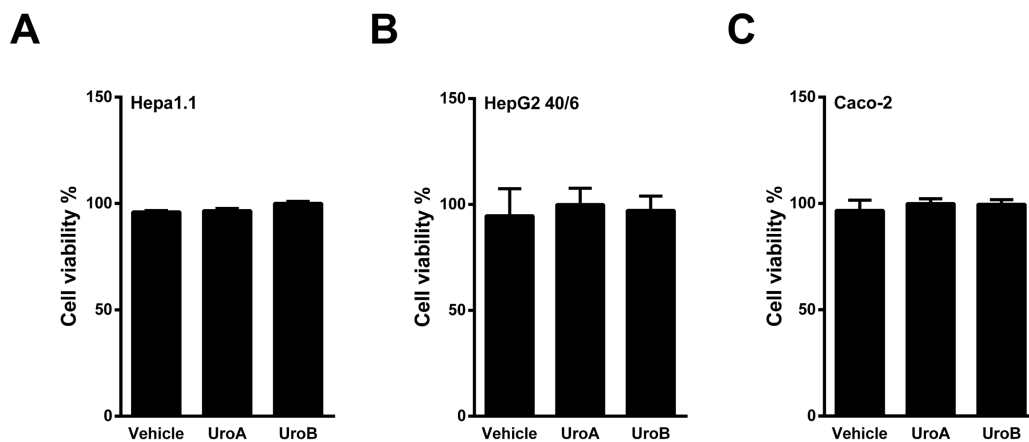

**Fig. S1.** UroA does not cause cytotoxicity in Hepa1.1, HepG2 (40/6) or Caco-2 cells. MTT assay was performed on (a) Hepa1.1 or HepG2 (40/6) cells treated with 10  $\mu$ M of UroA or B for 4 h, (b) Caco-2 cells treated with 10  $\mu$ M of UroA for 16 h.
